# Supplementary material
Source: PubMed Central journal article supplement (PMC8451402)
Supplement: jcm.00527-21-s0001.pdf [file jcm.00527-21-s0001.pdf]

1 **Evaluation of cell-based and surrogate SARS-CoV-2 neutralization assays**

2 Running title (54 characters): Evaluation of SARS-CoV-2 neutralizing antibody assays

3  
4 Anton M. Sholukh, Andrew Fiore-Gartland, Emily S. Ford, Maurine D. Miner, Yixuan J. Hou,  
5 Victor Tse, Haiying Zhu, Joyce Lu, Bhanupriya Madarampalli, Hannah Kaiser, Arnold Park,  
6 Florian A. Lempp, Russell Saint Germain, Emily Bossard, Jia Jin Kee, Kurt Diem, Andrew B.  
7 Stuart, Peter B. Rupert, Chance Brock, Matthew Buerger, Margaret K. Doll, April Kaur  
8 Randhawa, Leonidas Stamatatos, Roland K. Strong, Colleen McLaughlin, Meei-Li Huang,  
9 Keith R. Jerome, Ralph S. Baric, David Montefiori, and Lawrence Corey

10  
11  
12  
13  
14 **Supplementary materials**  
15

## Supplementary Methods

16  
17

18 **Protein antigens for the Luminex binding antibody assay.** A recombinant form of a synthetic  
19 construct (SARS\_CoV\_2\_ectoCSPP (1); GenBank: QJE37812.1) of the spike (S) glycoprotein from  
20 SARS-CoV-2 Wuhan-Hu-1 was produced in human HEK293 cells (FreeStyle™ 293-F Cells,  
21 ThermoFisher, Waltham, MA) using a lentivirus expression system (2) and purified by nickel affinity and  
22 size-exclusion chromatography. Purity and solution monodispersivity were confirmed by comparative  
23 reduced/non-reduced PAGE, analytical size-exclusion chromatography, and static/dynamic light  
24 scattering on Uncle (Unchained Labs, Pleasanton, CA) and showed uniform trimerization. The  
25 recombinant protein was modified by replacing the native leader sequence with a murine Igk leader,  
26 removing the polybasic S1/S2 cleavage site (RRAR to A), stabilized with a pair of proline mutations  
27 (2P), and incorporating a thrombin cleavage site, a T4 foldon trimerization domain, a hexa-histidine  
28 purification tag, and a C-terminal Avi-Tag (3). After purification, the protein was sterile filtered and  
29 aliquoted in DPBS, no calcium, no magnesium (ThermoFisher). Alternatively, spike protein was  
30 produced as described elsewhere (4). Both spike protein preparations were tested in a binding assay  
31 and no difference in recognition by serum and plasma samples from different convalescent subjects  
32 was found. Receptor binding domain (RBD) was produced in the same construct, swapping a tobacco  
33 etch virus (TEV) protease site (5) for the thrombin cleavage site. SARS-CoV-2 nucleoprotein was  
34 purchased from GenScript (Piscataway, NJ) and tetanus toxoid from Lonza (Basel, Switzerland).

35 **In-house Luminex SARS-CoV-2 IgG binding antibody assay.** Protein antigens were coupled to the  
36 Bio-Plex Pro Magnetic COOH beads in a ratio of 10 µg of antigen per  $2.5 \times 10^6$  beads in a two-step  
37 carbodiimide reaction. First, beads were washed and resuspended in Activation Buffer (100 mM MES,  
38 pH 6) and then incubated with N-hydroxysulfosuccinimide (Sulfo-NHS, catalog number 24520;  
39 ThermoFisher) and 1-ethyl-3-[3-dimethylaminopropyl]carbodiimide-HCl (EDC, catalog number 77149;  
40 ThermoFisher) also dissolved in Activation Buffer for 20 minutes on an end-over-end rotational mixer at  
41 room temperature protected from light. Activated beads were washed three times in Activation buffer.  
42 For coupling, antigen was mixed with activated beads and reaction was carried out for 2 h on a

43 rotational mixer at room temperature protected from light. Conjugated beads were washed three times  
44 with Wash buffer (PBS, 0.05% Tween-20, 1% BSA, 0.1% NaN<sub>3</sub>) and finally resuspended in Wash  
45 buffer at 10<sup>7</sup> beads/ml. Beads were stored at 4 °C for no longer than 30 days.

46 Antigen-specific IgG was measured using two replicate dilutions. Beads were blocked with phosphate  
47 buffered saline (PBS; Gibco) containing 5% BSA (Bio-Rad) and 0.05% Tween-20 (Sigma) and  
48 incubated for 1 hour with serially diluted plasma samples. Next, beads were washed 3 times with 0.05%  
49 Tween-20 in PBS and incubated with anti-human IgG Fc-PE (catalog number 2048-09; Southern  
50 Biotech). After incubation with secondary antibody, beads were washed and resuspended in PBS with  
51 1% BSA and 0.05% Tween-20 and binding data were collected on Bio-Plex 200 instrument (Bio-Rad).  
52 Median Fluorescence Intensity (MFI) was measured for a minimum of 50 beads per region. Background  
53 was established by measuring the MFI of beads conjugated to antigens but incubated in Assay buffer.  
54 Background MFI values were subtracted from all readings. We also trialed unconjugated beads and  
55 beads conjugated to a decoy antigen with the same plasma samples used in testing and did not detect  
56 non-specific binding above the assay background described above.

57 An IgG standard curve run in duplicate was used to estimate IgG concentration. For that, anti-human  
58 IgG Fab-specific (Southern Biotech) was conjugated to MagPlex beads. IgG-coupled beads were  
59 blocked, washed and incubated with serially diluted human standard IgG (catalog number I4506;  
60 Sigma) for 1 h. Standard beads were washed and incubated with anti-human IgG Fc-PE and MFI was  
61 measured as described above. MFI readings and associated IgG concentrations were fitted to a four-  
62 parameter logistic curve (4PL) using the R packages *nCal* and *drc*. A standard curve for each  
63 experiment was used to obtain the effective concentrations of IgG in serum using the MFI measured  
64 with antigen-coated beads. Since plasma samples were also run as a dilution series we used the  
65 median of the estimated concentrations from the dilutions that yielded MFIs between 100 and 10,000.  
66 Plasma with all values above (below) this range were right (left) censored at the concentration of the  
67 minimum (maximum) MFI.

68 **VSV-pseudovirus.** The codon-optimized sequence of the SARS-CoV-2 spike protein  
69 (YP\_009724390.1) with a truncation of the 19 C-terminal amino acids (D19) was cloned into a  
70 pcDNA3.1(+) vector (ThermoFisher) under control of the human CMV promoter to generate  
71 pcDNA3.1(+)-SARS-CoV-2-D19. The C-terminal truncation leads to a deletion of the ER-retention  
72 signal, localizing the spike protein to the cell surface, which enhances pseudovirus packaging (6).  
73 VSV(G\*ΔG-luciferase) system was purchased from Kerafast (7, 8). Twenty-four hours prior infection  
74 with VSV(G\*ΔG-luciferase), 293T cells were transfected with pcDNA-WuhanCoV-S-D19. Next day,  
75 supernatant was harvest, centrifuged for 5 min at 1,000xg, aliquoted and stored at -80 °C. TCID<sub>50</sub> was  
76 measured by infecting Vero cells (catalog number CCL-81; ATCC) with serial 2-fold dilutions of the  
77 prepared pseudovirus.

78 **LV-pseudovirus.** An expression plasmid encoding codon-optimized full-length spike of the Wuhan-1  
79 strain (VRC7480), was provided by Drs. Barney Graham and Kizzmekia Corbett at the Vaccine  
80 Research Center, National Institutes of Health (USA). The D614G mutation was introduced into  
81 VRC7480 by site-directed mutagenesis using the QuikChange Lightning Site-Directed Mutagenesis Kit  
82 from (catalog number 210518; Agilent Technologies). The mutation was confirmed by full-length spike  
83 gene sequencing. Pseudovirions were produced in HEK 293T/17 cells (catalog number CRL-11268;  
84 ATCC) by transfection using Fugene 6 (catalog number E2692; Promega). Pseudovirions for  
85 293T/ACE2 infection were produced by co-transfection with a lentiviral backbone (pCMV-ΔR8.2) and  
86 firefly luciferase reporter gene (pHR'-CMV-Luc) (9). Pseudovirions for TZM-bl/ACE2/TMPRSS2  
87 infection were produced by co-transfection with the Env-deficient lentiviral backbone pSG3ΔEnv (kindly  
88 provided by Drs Beatrice Hahn and Feng Gao). Culture supernatants from transfections were clarified  
89 of cells by low-speed centrifugation and filtration (0.45 μm filter) and stored in 1 ml aliquots at -80°C.

90 **Live SARS-CoV-2 neutralization assay.** All the live virus experiments were performed under BSL-3  
91 conditions at negative pressure, by operators in Tyvek suits wearing personal powered-air purifying  
92 respirators. Vero E6 cells were seeded at 2x10<sup>4</sup> cells/well in a 96-well plate 24 h before the assay.  
93 Seventy five pfu of the recombinant SARS-CoV-2-nanoLuc virus (rSARS-CoV-2-nLuc) (10) were mixed

94 with Ab at 1:1 ratio and incubated at 37°C for 1h. A 8-points, 3-fold dilution curve was generated for  
95 each sample with starting concentration at 1:50. Virus and Ab mix was added to each well and  
96 incubated at 37°C + 5% CO<sub>2</sub> for 48h. Luciferase activities were measured by Nano-Glo Luciferase  
97 Assay System (Promega) following manufacturer protocol using SpectraMax M3 luminometer  
98 (Molecular Devices). Percent neutralization was calculated by the following equation:  $[1 - (\text{RLU with}$   
99  $\text{sample} / \text{RLU with mock treatment})] \times 100\%$ .

100 **VSV pseudovirus neutralization assay.** Assay was carried out in BSL-2 laboratory. Vero cells  
101 (ATCC® CCL-81™) were seeded at  $2 \times 10^4$  cells/well in a black-walled 96-well plates 24 hours before  
102 the assay. A 7-point, 3-fold dilution curve was generated with starting sample dilution at 1:20 in a  
103 separate round-bottom 96-well plate.  $3.8 \times 10^2$  TCID<sub>50</sub> of rVSV(G\*ΔG-luciferase) pseudovirus with  
104 SARS-CoV-2-D19 spike protein (PsVSV-Luc-D19) was mixed with the plasma dilutions. Plasma-virus  
105 mixture was incubated at 37 °C in 5% CO<sub>2</sub> for 30 minutes. After incubation, plasma-virus mixture was  
106 transferred onto the Vero cells. Cells were then incubated at 37 °C, 5% CO<sub>2</sub> for 18-20 hours. Luciferase  
107 activity was measured by Bio-Glo Luciferase Assay System (catalog number G7940; Promega)  
108 following manufacturer protocol using 2030 VICTOR X3 multilabel reader (PerkinElmer). Percent virus  
109 neutralization was calculated by the following equation:  $[1 - (\text{luminescence of sample} / \text{luminescence of}$   
110  $\text{cells+virus control})] \times 100\%$ .

111 **LV-pseudovirus neutralization assays.** Assays were carried out in BSL-2 laboratory. Neutralization  
112 of SARS-CoV-2 Spike-pseudotyped virus prepared with lentiviral vectors was performed by using  
113 infection in either HEK 293T cells expressing human ACE2 (293T/ACE2.MF) or TZM-bl cells  
114 expressing both ACE2 and TMPRSS2 (TZM-bl/ACE2/TMPRSS2 cells). Both cell lines kindly provided  
115 by Drs. Mike Farzan and Huihui Mu at Scripps). Cells were maintained in DMEM containing 10% FBS,  
116 1% Pen Strep and 3 ug/ml puromycin.

117 293T/ACE2 cells pseudovirus assay. For the 293T/ACE2 assay, a pre-titrated dose of virus was  
118 incubated with serial 3-fold dilutions of test sample in duplicate in a total volume of 150 ul for 1 hr at

119 37°C in 96-well flat-bottom black/white culture plates. Freshly trypsinized cells (10,000 cells in 100 µl of  
120 growth medium) was added to each well. One set of control wells received cells + virus (virus control)  
121 and another set received cells only (background control). After 68-72 hours of incubation, 100 µl of cell  
122 lysate was transferred to a 96-well black/white plate (catalog number 6005060; Perkin-Elmer) for  
123 measurements of luminescence using the Promega Luciferase Assay System (catalog number E1501;  
124 Promega). Neutralization titers are the serum dilution at which RLUs were reduced by 50% and 80%  
125 compared to virus control wells after subtraction of background RLUs. MPI is the reduction in RLU at  
126 the lowest serum dilution tested.

127 ACE2/TMPRSS2 TZM-bl cells pseudovirus assay. For the TZM-bl/ACE2/TMPRSS2 assay, a pre-  
128 titrated dose of virus was incubated with serial 3-fold dilutions of test sample in duplicate in a total  
129 volume of 150 µl for 1 hr at 37°C in 96-well flat-bottom culture plates. Freshly trypsinized cells (10,000  
130 cells in 100 µl of growth medium containing 75 µg/ml DEAE dextran) were added to each well. One set  
131 of control wells received cells + virus (virus control) and another set received cells only (background  
132 control). After 68-72 hours of incubation, 100 µl of cell lysate was transferred to a 96-well black solid  
133 plate (Costar) for measurements of luminescence using the BriteLite Luminescence Reporter Gene  
134 Assay System (PerkinElmer Life Sciences). Neutralization titers are the serum dilution at which relative  
135 luminescence units (RLU) were reduced by 50% and 80% compared to virus control wells after  
136 subtraction of background RLUs. Maximum percent inhibition (MPI) is the reduction in RLU at the  
137 lowest serum dilution tested.

138 **SARS-CoV-2 Surrogate Virus Neutralization Test (sVNT).** Assay was carried out in BSL-1  
139 laboratory and was performed according to manufacturer (GenScript) protocol and recommendations  
140 as follows. Capture plate was incubated with plasma samples diluted 1:10, washed and probed with  
141 secondary antibody. Assay was developed via TMB (ThermoFisher) and OD at 450 nm was measured  
142 using SpectraMax M2 reader (Molecular Devices). Positive and negative controls were provided in the  
143 kit. Binding inhibition was determined via the following formula: Inhibition =  $(1 - (\text{OD of sample} / \text{OD of}$   
144  $\text{Negative control})) \times 100\%$ . Percent binding inhibition was interpreted as a percent neutralization. In

145 order to determine ND50, plasma samples were serially diluted starting from 1:10 and assay was  
146 performed as described above.

147 **Statistical Analysis and Visualization.** Neutralization titers were defined as the plasma dilution that  
148 reduced relative luminescence units (RLU) by 50% or 80% relative to virus control wells (cells + virus  
149 only) after subtraction of background RLU in cells-only control wells. RLU was first transformed to  
150 neutralization using the formula  $neut = 1 - ([RLU_{sample} - bkgd] / [RLU_{VO} - bkgd])$ . The neutralization  
151 vs. dilution curve was then fit with a four-parameter logistic curve (4PL) model that was used to  
152 estimate the dilution at which there would be 50% or 80% neutralization. For samples with all dilutions  
153 having <50% neutralization the result was right censored at the highest concentration. Fifty and 80  
154 percent neutralization titers (ND50 and ND80) were estimated using the nCal and drc packages in R.  
155 Patient demographic information (sex and age) was extracted from a RedEDCap survey database.  
156 Abbott assay results (including index value) were extracted from the laboratory information system  
157 (Sunquest Laboratory).

158 Correlations and group differences were estimated using parametric methods and testing (e.g. Pearson  
159 correlation and Student's t test). Log-transformed ND50 values and IgG concentrations  
160 were approximately normally distributed with few outliers and a low level of censoring, justifying use  
161 of these methods. Left censored values were given a value of half the level of detection, which  
162 corresponded to the first dilution for each neutralization assay.

163

164

165

166

167

168 References:

- 169 1. Wrapp D, Wang N, Corbett KS, Goldsmith JA, Hsieh CL, Abiona O, Graham BS, McLellan JS.  
170 2020. Cryo-EM Structure of the 2019-nCoV Spike in the Prefusion Conformation.  
171 bioRxiv2020/06/09.
- 172 2. Bandaranayake AD, Correnti C, Ryu BY, Brault M, Strong RK, Rawlings DJ. 2011. Daedalus: a  
173 robust, turnkey platform for rapid production of decigram quantities of active recombinant  
174 proteins in human cell lines using novel lentiviral vectors. *Nucleic Acids Res*2011/09/14.  
175 39:e143.
- 176 3. Ashraf SS, Benson RE, Payne ES, Halbleib CM, Gron H. 2004. A novel multi-affinity tag system  
177 to produce high levels of soluble and biotinylated proteins in *Escherichia coli*. *Protein Expr Purif*  
178 33:238–245.
- 179 4. Seydoux E, Homad LJ, MacCamy AJ, Parks KR, Hurlburt NK, Jennewein MF, Akins NR, Stuart  
180 AB, Wan YH, Feng J, Whaley RE, Singh S, Boeckh M, Cohen KW, McElrath MJ, Englund JA,  
181 Chu HY, Pancera M, McGuire AT, Stamatatos L. 2020. Analysis of a SARS-CoV-2-Infected  
182 Individual Reveals Development of Potent Neutralizing Antibodies with Limited Somatic  
183 Mutation. *Immunity* 53:98-105.e5.
- 184 5. Cesaratto F, Lopez-Requena A, Burrone OR, Petris G. 2015. Engineered tobacco etch virus  
185 (TEV) protease active in the secretory pathway of mammalian cells. *J Biotechnol* 212:159–166.
- 186 6. Ou X, Liu Y, Lei X, Li P, Mi D, Ren L, Guo L, Guo R, Chen T, Hu J, Xiang Z, Mu Z, Chen X, Chen  
187 J, Hu K, Jin Q, Wang J, Qian Z. 2020. Characterization of spike glycoprotein of SARS-CoV-2 on  
188 virus entry and its immune cross-reactivity with SARS-CoV. *Nat Commun* 11:1620.
- 189 7. Whitt MA. 2010. Generation of VSV pseudotypes using recombinant DeltaG-VSV for studies on  
190 virus entry, identification of entry inhibitors, and immune responses to vaccines. *J Virol Methods*



- 191 169:365–374.
- 192 8. Zhao X, Howell KA, He S, Brannan JM, Wec AZ, Davidson E, Turner HL, Chiang C-I, Lei L, Fels  
193 JM, Vu H, Shulenin S, Turonis AN, Kuehne AI, Liu G, Ta M, Wang Y, Sundling C, Xiao Y,  
194 Spence JS, Doranz BJ, Holtsberg FW, Ward AB, Chandran K, Dye JM, Qiu X, Li Y, Aman MJ.  
195 2017. Immunization-Elicited Broadly Protective Antibody Reveals Ebolavirus Fusion Loop as a  
196 Site of Vulnerability. *Cell* 169:891-904.e15.
- 197 9. Naldini L, Blömer U, Gage FH, Trono D, Verma IM. 1996. Efficient transfer, integration, and  
198 sustained long-term expression of the transgene in adult rat brains injected with a lentiviral  
199 vector. *Proc Natl Acad Sci U S A* 93:11382–11388.
- 200 10. Hou YJ, Okuda K, Edwards CE, Martinez DR, Asakura T, Dinnon KH, Kato T, Lee RE, Yount BL,  
201 Mascenik TM, Chen G, Olivier KN, Ghio A, Tse L V., Leist SR, Gralinski LE, Schäfer A, Dang H,  
202 Gilmore R, Nakano S, Sun L, Fulcher ML, Livraghi-Butrico A, Nicely NI, Cameron M, Cameron C,  
203 Kelvin DJ, de Silva A, Margolis DM, Markmann A, Bartelt L, Zumwalt R, Martinez FJ, Salvatore  
204 SP, Borczuk A, Tata PR, Sontake V, Kimple A, Jaspers I, O’Neal WK, Randell SH, Boucher RC,  
205 Baric RS. 2020. SARS-CoV-2 Reverse Genetics Reveals a Variable Infection Gradient in the  
206 Respiratory Tract. *Cell* 1–18.

207

208

209

210

**Supplementary Figures and Tables**

211  
212  
213  
214  
215  
216  
217  
218

**Supplementary Table 1. Symptoms reported by study participants.**

| <b>Symptom</b>           | <b>Yes</b> | <b>No</b> | <b>Missing</b> | <b>Percent reporting symptom</b> |
|--------------------------|------------|-----------|----------------|----------------------------------|
| <b>Fever</b>             | 23         | 11        | 6              | 57.5                             |
| <b>Chills</b>            | 26         | 10        | 4              | 65                               |
| <b>Fatigue</b>           | 35         | 4         | 1              | 87.5                             |
| <b>Myalgia</b>           | 27         | 9         | 4              | 67.5                             |
| <b>Sore throat</b>       | 20         | 14        | 6              | 50                               |
| <b>Cough</b>             | 29         | 6         | 5              | 72.5                             |
| <b>Rhinorrhea</b>        | 24         | 10        | 6              | 60                               |
| <b>Dyspnea</b>           | 22         | 13        | 5              | 55                               |
| <b>Wheezing</b>          | 6          | 19        | 15             | 15                               |
| <b>Chest pain</b>        | 13         | 16        | 11             | 32.5                             |
| <b>Other respiratory</b> | 8          | 17        | 15             | 20                               |
| <b>Headache</b>          | 27         | 8         | 5              | 67.5                             |
| <b>Nausea</b>            | 9          | 18        | 13             | 22.5                             |
| <b>Abdominal pain</b>    | 6          | 20        | 14             | 15                               |
| <b>Diarrhea</b>          | 14         | 16        | 10             | 35                               |
| <b>Loss senses</b>       | 26         | 8         | 6              | 65                               |
| <b>Eye pain</b>          | 7          | 19        | 14             | 17.5                             |
| <b>Rash feet</b>         | 2          | 21        | 17             | 5                                |
| <b>Rash body</b>         | 4          | 21        | 15             | 10                               |

219

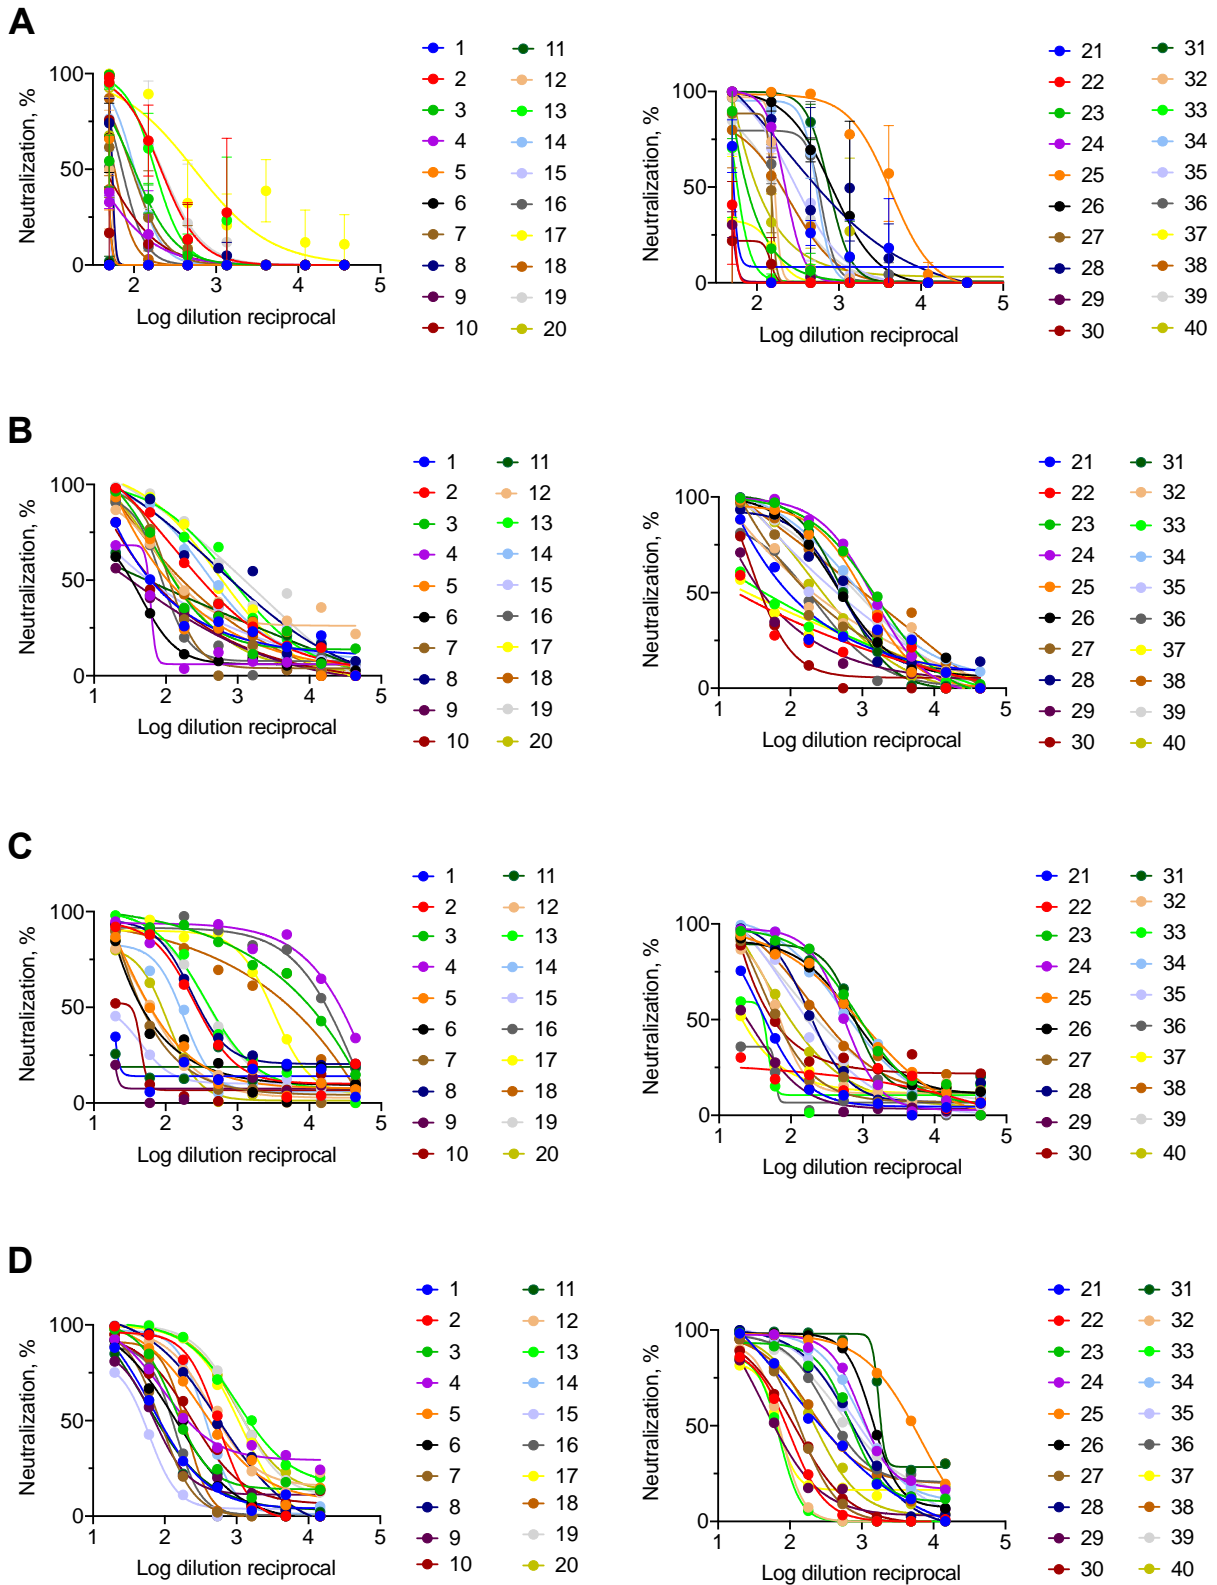

221 **Supplementary Figure 1. Neutralizing antibody assay.** (A) SARS-CoV-2-nLuc in Vero E6 cells. (B)  
 222 LV-pseudo in 293T/ACE2 cells. (C) LV-pseudo in TZM-bl/ACE2/TMPRSS2 cells. (D) PsVSV-Luc-D19  
 223 in Vero cells. Participant samples are as colored lines and circles numbered 1 – 40.

224

225 **A**

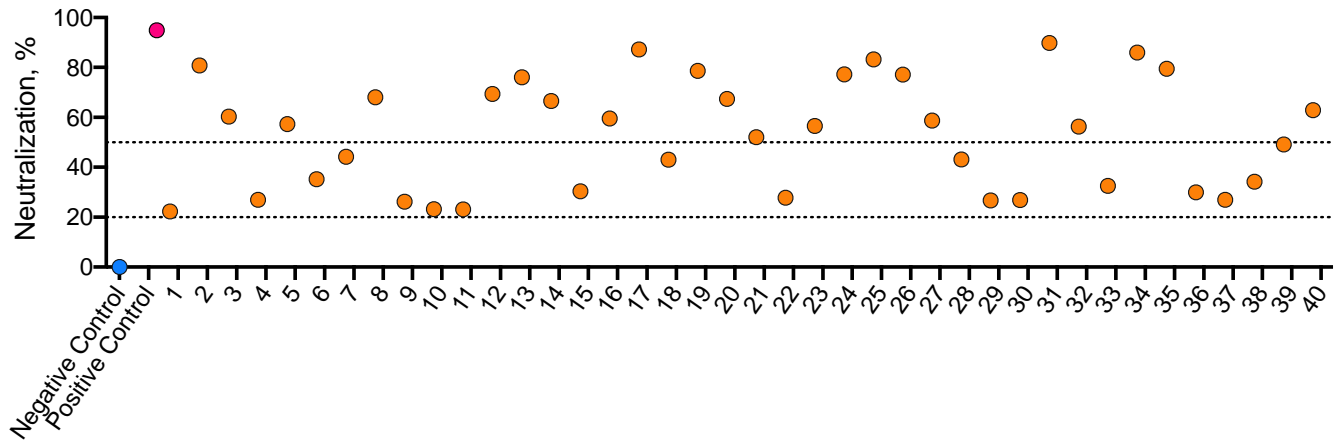

226

227

228 **B**

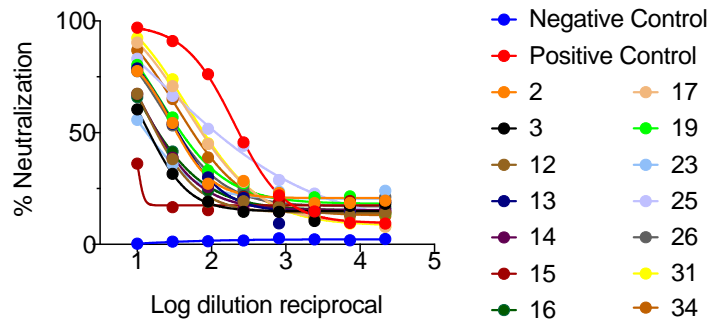

229

230 **Supplementary Figure 2. Surrogate virus neutralization test from GenScript.** A, samples tested in

231 1:10 dilution as per manufacturer protocol. Dotted lines show 50 and 20% neutralization, respectively.

232 Twenty percent is suggested as positivity cutoff by the manufacturer. B, plasma samples were titrated

233 2-fold starting at 1:10 to impute ND50 titers.

234

**A**

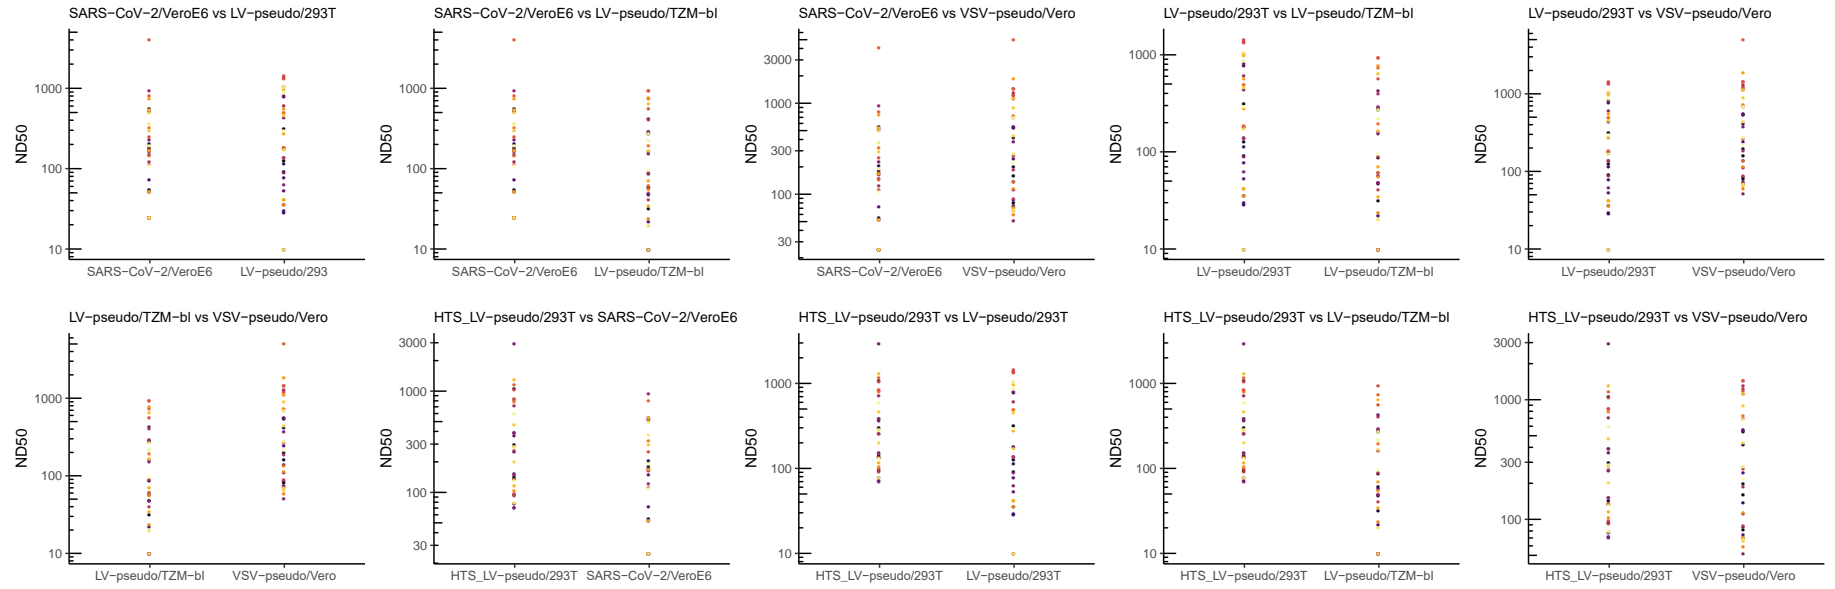

235

236

237

**B**

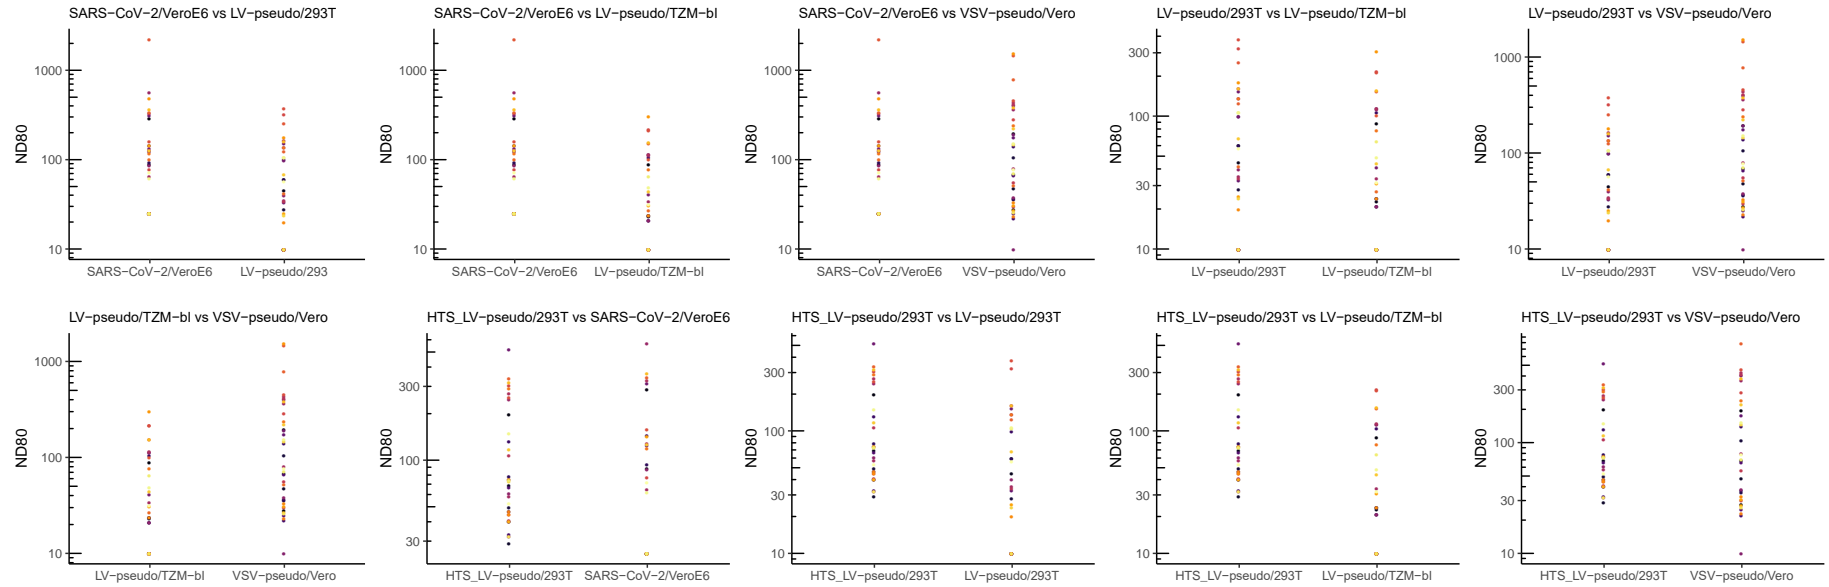

238  
239

240 **Supplementary Figure 3. Comparison of ND50 (A) and ND80 (B) titers measured in cell-based assays.** Data used same as  
 241 represented in Fig. 1 but replotted with lines connecting individual color-coded samples to illustrate the direction of ND50 and ND80 shift  
 242 between assays.

243

244  
245

**Supplementary Table 2. GMT of ND50 and ND80 for each neutralization assay represented on Supplementary Figure 3, with fold-differences computed.**

|                    | Assay              | GMT   | 95% CI<br>LCL | 95% CI<br>UCL | fold-<br>difference | Difference<br>sign | Assay             | GMT   | 95% CI<br>LCL | 95% CI<br>UCL | N     | p-value |
|--------------------|--------------------|-------|---------------|---------------|---------------------|--------------------|-------------------|-------|---------------|---------------|-------|---------|
| ND50               | SARS-CoV-2/VeroE6  | 141.3 | 93.7          | 213.0         | 12.8                | >                  | sVNT              | 11.2  | 7.6           | 16.4          | 31    | <0.001  |
|                    | SARS-CoV-2/VeroE6  | 141.3 | 93.7          | 213.0         | 1.3                 | <                  | LV-pseudo/293T    | 177.9 | 112.0         | 282.7         | 40    | 0.112   |
|                    | SARS-CoV-2/VeroE6  | 141.3 | 93.7          | 213.0         | 1.6                 | >                  | LV-pseudo/TZM-bl  | 89.9  | 57.0          | 141.9         | 40    | 0.003   |
|                    | SARS-CoV-2/VeroE6  | 141.3 | 93.7          | 213.0         | 2.2                 | <                  | VSV-pseudo/Vero   | 309.7 | 211.3         | 454.0         | 40    | <0.001  |
|                    | sVNT               | 11.2  | 7.6           | 16.4          | 14.8                | <                  | LV-pseudo/293T    | 177.9 | 112.0         | 282.7         | 31    | <0.001  |
|                    | sVNT               | 11.2  | 7.6           | 16.4          | 7.6                 | <                  | LV-pseudo/TZM-bl  | 89.9  | 57.0          | 141.9         | 31    | <0.001  |
|                    | sVNT               | 11.2  | 7.6           | 16.4          | 26.1                | <                  | VSV-pseudo/Vero   | 309.7 | 211.3         | 454.0         | 31    | <0.001  |
|                    | LV-pseudo/293T     | 177.9 | 112.0         | 282.7         | 2.0                 | >                  | LV-pseudo/TZM-bl  | 89.9  | 57.0          | 141.9         | 40    | <0.001  |
|                    | LV-pseudo/293T     | 177.9 | 112.0         | 282.7         | 1.7                 | <                  | VSV-pseudo/Vero   | 309.7 | 211.3         | 454.0         | 40    | 0.002   |
|                    | LV-pseudo/TZM-bl   | 89.9  | 57.0          | 141.9         | 3.4                 | <                  | VSV-pseudo/Vero   | 309.7 | 211.3         | 454.0         | 40    | <0.001  |
|                    | HTS_LV-pseudo/293T | 271.7 | 266.8         | 643.4         | 1.92                | >                  | SARS-CoV-2/VeroE6 | 141.3 | 93.7          | 213.0         | 36    | <0.001  |
|                    | HTS_LV-pseudo/293T | 271.7 | 266.8         | 643.4         | 24.3                | >                  | sVNT              | 11.2  | 7.6           | 16.4          | 31    | <0.001  |
|                    | HTS_LV-pseudo/293T | 271.7 | 266.8         | 643.4         | 1.5                 | >                  | LV-pseudo/293T    | 177.9 | 112.0         | 282.7         | 36    | <0.001  |
|                    | HTS_LV-pseudo/293T | 271.7 | 266.8         | 643.4         | 3                   | >                  | LV-pseudo/TZM-bl  | 89.9  | 57.0          | 141.9         | 36    | <0.001  |
| HTS_LV-pseudo/293T | 271.7              | 266.8 | 643.4         | 1.1           | <                   | VSV-pseudo/Vero    | 309.7             | 211.3 | 454.0         | 36            | 0.856 |         |
| ND80               | SARS-CoV-2/VeroE6  | 79.3  | 54.8          | 114.8         | 13.0                | >                  | sVNT              | 6.0   | 5.1           | 7.0           | 31    | <0.001  |
|                    | SARS-CoV-2/VeroE6  | 79.3  | 54.8          | 114.8         | 1.9                 | >                  | LV-pseudo/293T    | 42.0  | 28.8          | 61.1          | 40    | <0.001  |
|                    | SARS-CoV-2/VeroE6  | 79.3  | 54.8          | 114.8         | 2.4                 | >                  | LV-pseudo/TZM-bl  | 33.0  | 23.3          | 46.8          | 40    | <0.001  |
|                    | SARS-CoV-2/VeroE6  | 79.3  | 54.8          | 114.8         | 1.3                 | <                  | VSV-pseudo/Vero   | 102.8 | 69.0          | 153.2         | 40    | 0.027   |
|                    | sVNT               | 6.0   | 5.1           | 7.0           | 6.8                 | <                  | LV-pseudo/293T    | 42.0  | 28.8          | 61.1          | 31    | <0.001  |
|                    | sVNT               | 6.0   | 5.1           | 7.0           | 5.5                 | <                  | LV-pseudo/TZM-bl  | 32.7  | 21.6          | 49.4          | 31    | <0.001  |
|                    | sVNT               | 6.0   | 5.1           | 7.0           | 16.6                | <                  | VSV-pseudo/Vero   | 102.8 | 69.0          | 153.2         | 31    | <0.001  |
|                    | LV-pseudo/293T     | 42.0  | 28.8          | 61.1          | 1.3                 | >                  | LV-pseudo/TZM-bl  | 33.0  | 23.3          | 46.8          | 40    | 0.001   |
|                    | LV-pseudo/293T     | 42.0  | 28.8          | 61.1          | 2.5                 | <                  | VSV-pseudo/Vero   | 102.8 | 69.0          | 153.2         | 40    | <0.001  |
|                    | LV-pseudo/TZM-bl   | 33.0  | 23.3          | 46.8          | 3.1                 | <                  | VSV-pseudo/Vero   | 102.8 | 69.0          | 153.2         | 40    | <0.001  |
|                    | HTS_LV-pseudo/293T | 86.3  | 83.9          | 163.4         | 1.1                 | >                  | SARS-CoV-2/VeroE6 | 79.3  | 54.8          | 114.8         | 36    | 0.009   |
|                    | HTS_LV-pseudo/293T | 86.3  | 83.9          | 163.4         | 14.4                | >                  | sVNT              | 6.0   | 5.1           | 7.0           | 31    | <0.001  |
|                    | HTS_LV-pseudo/293T | 86.3  | 83.9          | 163.4         | 2.1                 | >                  | LV-pseudo/293T    | 42.0  | 28.8          | 61.1          | 36    | <0.001  |
|                    | HTS_LV-pseudo/293T | 86.3  | 83.9          | 163.4         | 2.6                 | >                  | LV-pseudo/TZM-bl  | 33.0  | 23.3          | 46.8          | 36    | <0.001  |
| HTS_LV-pseudo/293T | 86.3               | 83.9  | 163.4         | 1.2           | <                   | VSV-pseudo/Vero    | 102.8             | 69.0  | 153.2         | 36            | 0.759 |         |

246

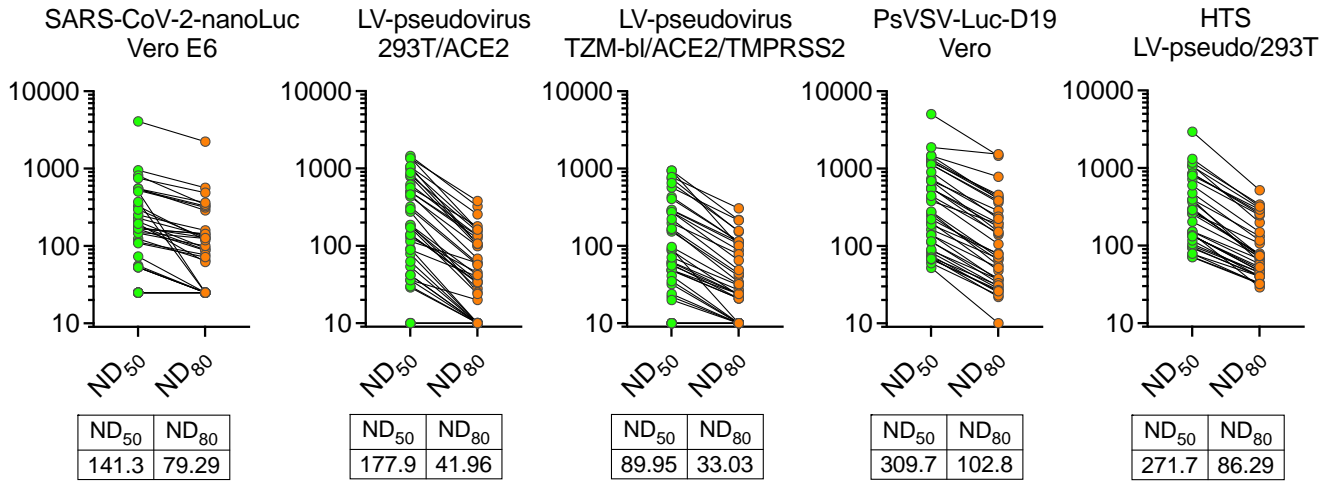

248

249 **Supplementary Figure 4. Comparison of differences between geometric mean ND50 and ND80**  
 250 **titers for each neutralization assay.** GMT ND50 and ND80 for the corresponding assay are shown  
 251 underneath each graph. Each circle is a participant plasma sample, with lines connecting the same  
 252 samples analyzed for the two neutralizing dilutions. Green circles are ND50 and orange circles are  
 253 ND80 values.



254 **Supplementary Table 3. Fold change between ND50 and ND80 values.**

| <b>Assay</b>       | <b>Mean ND fold change [95% CI]</b> | <b>P-value</b> |
|--------------------|-------------------------------------|----------------|
| SARS-CoV-2/Vero E6 | 1.954 [1.62, 2.29]                  | <0.0001        |
| LV-pseudo/293T     | 4.573 [3.65, 5.5]                   | <0.0001        |
| LV-pseudo/TZM-bl   | 4.478 [3.48, 5.48]                  | <0.0001        |
| VSV-pseudo/Vero    | 2.967 [2.7, 3.24]                   | <0.0001        |
| HTS_LV-pseudo/293T | 3.303 [2.93, 3.68]                  | <0.0001        |

255

256

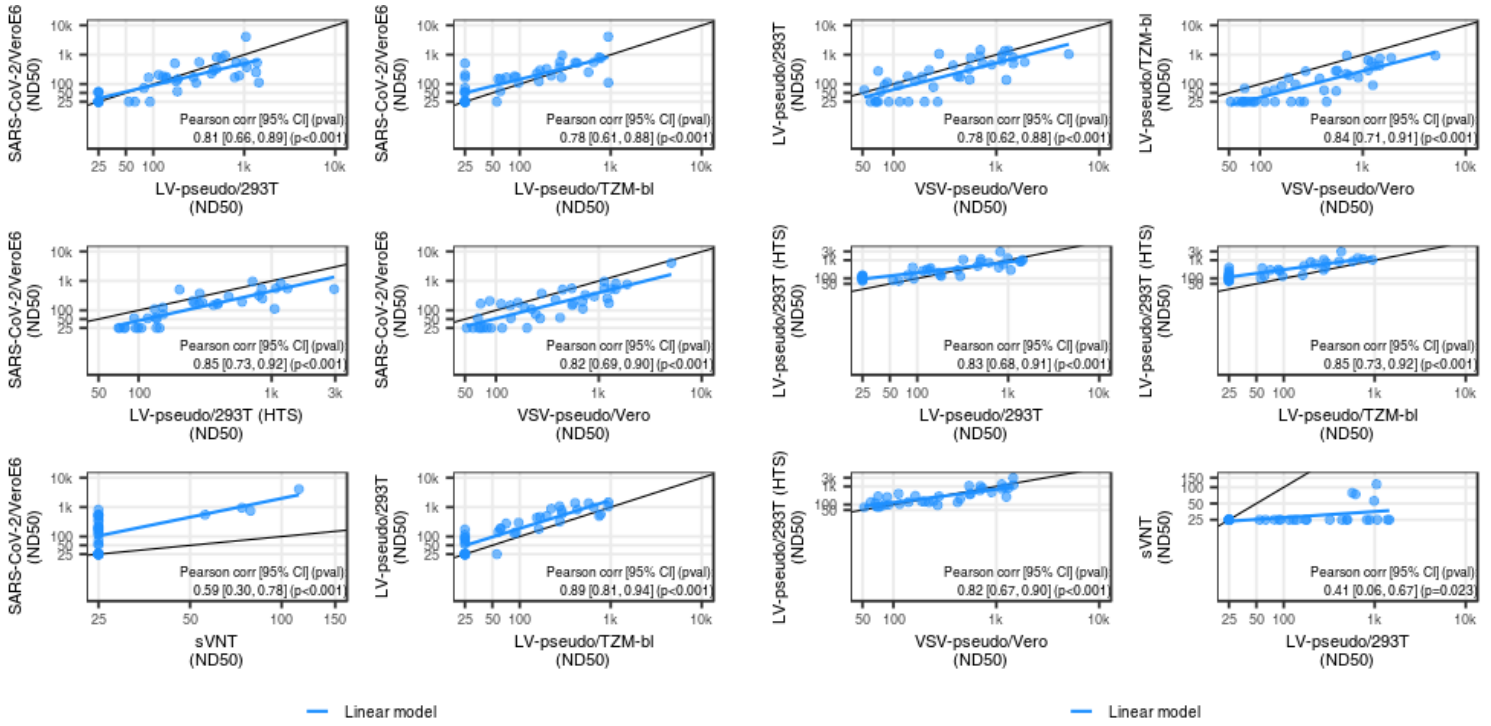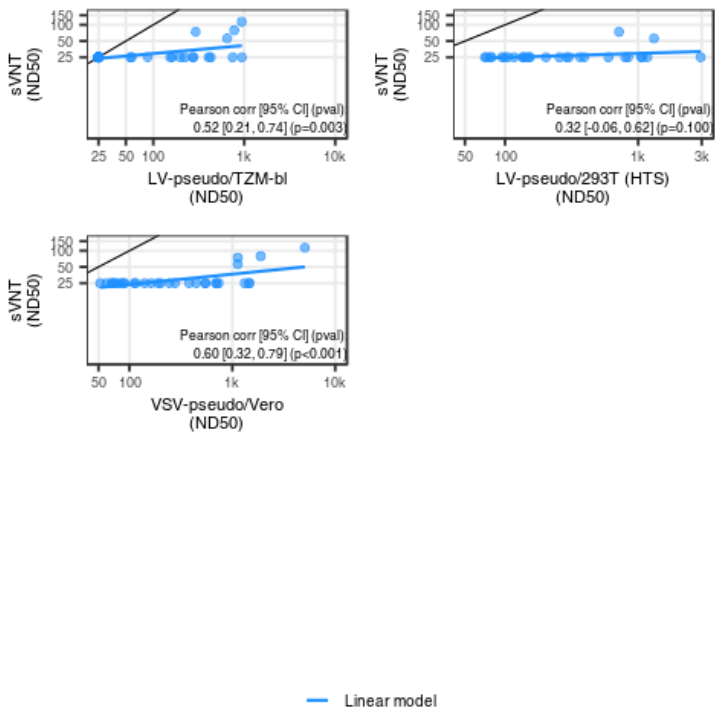

269 **Supplementary Figure 5. Pearson correlation model analysis of ND50 titers among**  
 270 **neutralization assays.**

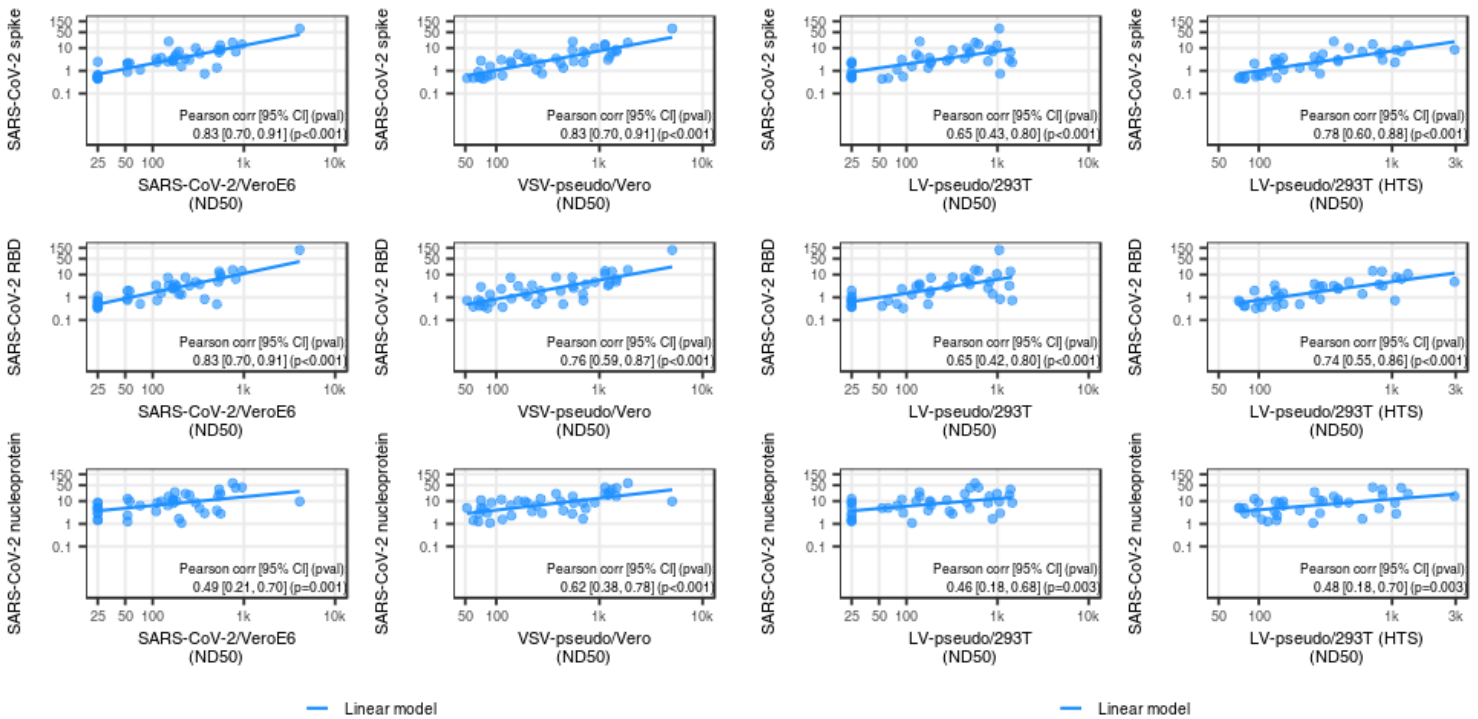

271

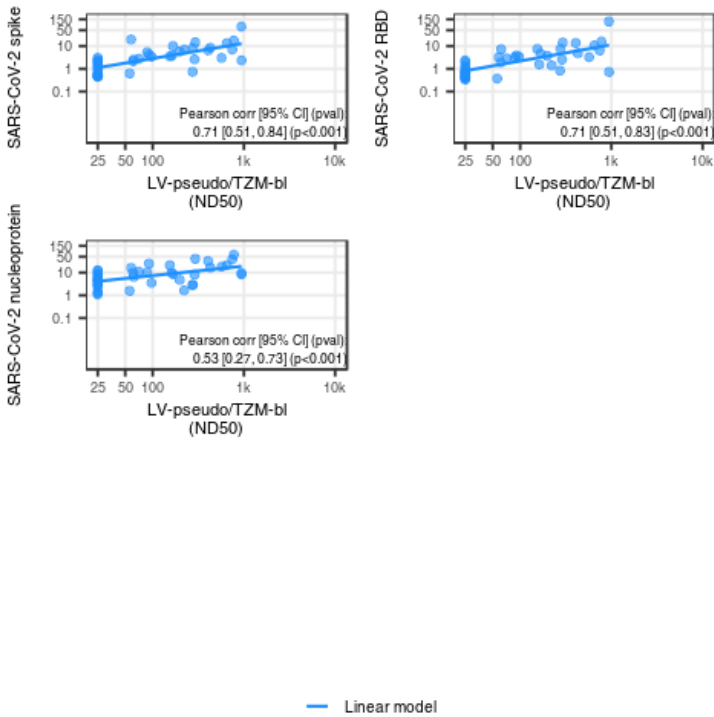

280

281 **Supplementary Figure 6. Pearson correlation model analysis of ND50 titers vs SARS-CoV-2**  
 282 **specific IgG concentration in plasma samples.**

283

284  
285  
286

**Supplementary Table 4. Tests for association of SARS-CoV-2 antibody neutralization and binding with age of participants.**

| <b>Assay</b>                          | <b>Measure</b> | <b>N</b> | <b>Age rho<sup>1</sup> (p-value)</b> |
|---------------------------------------|----------------|----------|--------------------------------------|
| SARS-CoV-2/VeroE6                     | ND50           | 40       | 0.28 (0.0751)                        |
| VSV-pseudo/Vero                       | ND50           | 40       | 0.30 (0.0602)                        |
| LV-pseudo/293T                        | ND50           | 40       | 0.24 (0.1288)                        |
| LV-pseudo/TZM-bl                      | ND50           | 40       | 0.27 (0.0885)                        |
| sVNT neutralization                   | ND50           | 31       | 0.43 (0.0160)                        |
| SARS-CoV-2/VeroE6                     | ND80           | 40       | 0.51 (0.0007)                        |
| VSV-pseudo/Vero                       | ND80           | 40       | 0.32 (0.0466)                        |
| LV-pseudo/293T                        | ND80           | 40       | 0.32 (0.0444)                        |
| LV-pseudo/TZM-bl                      | ND80           | 40       | 0.29 (0.0738)                        |
| sVNT neutralization                   | ND80           | 31       | 0.50 (0.0038)                        |
| sVNT neutralization (1:10 dilution)   | %              | 40       | 0.40 (0.0106)                        |
| Abbott nucleoprotein                  | index          | 40       | 0.45 (0.0034)                        |
| SARS-CoV-2 spike-specific IgG         | µg/mL          | 40       | 0.37 (0.0197)                        |
| SARS-CoV-2 RBD-specific IgG           | µg/mL          | 40       | 0.45 (0.0035)                        |
| SARS-CoV-2 nucleoprotein-specific IgG | µg/mL          | 40       | 0.39 (0.0126)                        |
| Tetanus toxoid-specific IgG           | µg/mL          | 40       | -0.14 (0.3853)                       |

287

<sup>1</sup>Spearman's rank correlation coefficient

288

<sup>2</sup>fold-difference indicates the geometric mean value in females/males, Student's *t* test p-value

289

290

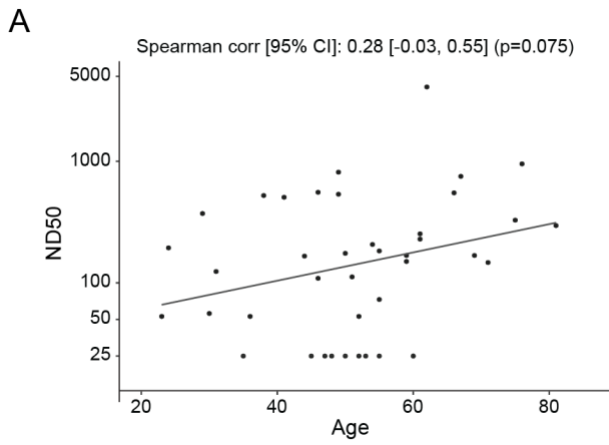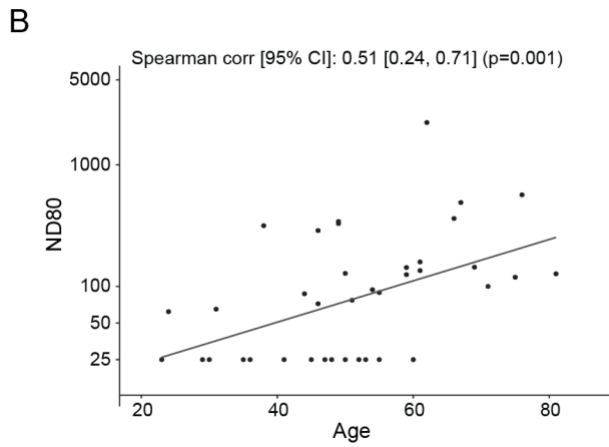

291

292 **Supplementary Figure 7. Correlation analysis of plasma neutralizing potency and age of**  
293 **participants. (A) ND50 versus age. (B) ND80 versus age.**

294

295

296

297

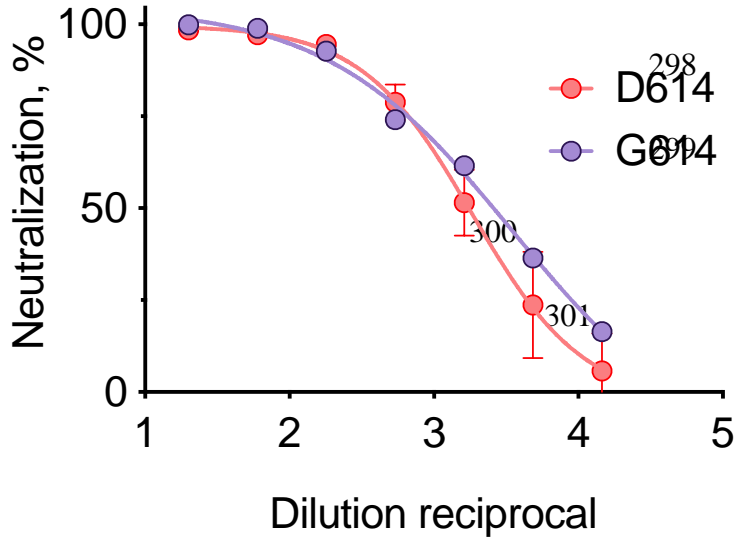

302

303

304

|             | <b>G614</b> | <b>D614</b> |
|-------------|-------------|-------------|
| <b>ND50</b> | 2584        | 1741        |
| <b>ND80</b> | 465         | 516         |

305 **Supplementary Figure 8. Comparison of neutralization of VSV-pseudovirus bearing**

306 **D614 and G614 mutations by the WHO standard. Red, VSV-pseudoviruses with D614;**

307 **Purple, VSV-pseudoviruses with G614.**
